# ShcA promotes chondrocyte hypertrophic commitment and osteoarthritis in mice through RunX2 nuclear translocation and YAP1 inactivation

Abou-Jaoude A.<sup>1</sup>, Courtes M.<sup>1</sup>, Badique L.<sup>1</sup>, Elhaj Mahmoud D.<sup>1</sup>, Abboud C.<sup>1</sup>, Mlih M.<sup>1</sup>, Justiniano H.<sup>1</sup>, Lemle A.<sup>1</sup>, Awan S.<sup>1</sup>, Terrand J.<sup>1</sup>, Niemeier A.<sup>2</sup>, Barbero A.<sup>3</sup>, Houard X.<sup>4</sup>, Boucher P.<sup>1,5</sup> & Matz RL<sup>1,5</sup>.

<sup>1</sup> UMR CNRS 7021 University of Strasbourg, 67401, Illkirch, France

<sup>2</sup> Department of Biochemistry and Molecular Cell Biology and Department of Orthopaedics, University Medical Center Hamburg-Eppendorf, Hamburg, Germany

<sup>3</sup> Department of Biomedicine, University Hospital Basel and University of Basel, Basel, Switzerland

<sup>4</sup> INSERM UMRS 938, University Pierre and Marie Curie, Hôpital Saint Antoine, Paris, France

<sup>5</sup> These authors are co-senior authors

Correspondence to: [philippe.boucher@unistra.fr](mailto:philippe.boucher@unistra.fr) or [rachel.matz-westphal@unistra.fr](mailto:rachel.matz-westphal@unistra.fr)

## Abstract:

Chondrocyte hypertrophic differentiation, a key process in endochondral ossification (EO), is also a feature of osteoarthritis leading to articular cartilage destruction. ShcA (Src homology and Collagen A) is an adaptor protein that binds to the cytoplasmic tail of receptor tyrosine kinases. We found that deletion of ShcA in chondrocytes of mice inhibits hypertrophic differentiation, alters the EO process, and leads to dwarfism. ShcA promotes ERK1/2 activation, nuclear translocation of the master transcription factor for chondrocyte hypertrophy, RunX2, while maintaining the Runx2 inhibitor YAP1 in its cytosolic inactive form. This leads to hypertrophic commitment and expression of markers of hypertrophy, such as Collagen X. In addition, ShcA deletion in chondrocytes protects from age-related osteoarthritis development in mice. Our results reveal that ShcA integrates multiple stimuli which affect the intracellular signaling processes leading to the hypertrophic commitment of chondrocytes and osteoarthritis.

28

## 29 INTRODUCTION

30 Chondrocyte differentiation and hypertrophy are key events in long bones and vertebral skeleton  
31 formation allowing skeletal growth from embryogenesis to skeletal maturity (1). During endochondral  
32 ossification (EO), chondrocytes produce transient cartilage scaffolds for new bone formation in the  
33 growth plate (1). The growth plate is a highly organized cartilage structure in which chondrocytes  
34 proliferate and differentiate in pre-hypertrophic and then hypertrophic chondrocytes. Hypertrophic  
35 chondrocytes orchestrate cartilage extracellular matrix (ECM) remodeling, its calcification and  
36 osteoblasts infiltration which lead to replacement of cartilage by bone and longitudinal bone growth.  
37 Defective hypertrophic differentiation and ossification can lead to impaired longitudinal growth and  
38 thus dwarfism (2).

39 Chondrocyte hypertrophy is also a feature of osteoarthritis (OA) as quiescent articular chondrocytes  
40 can undergo an aberrant terminal hypertrophic differentiation (3, 4). The switch from a quiescent to a  
41 hypertrophic phenotype is accompanied by the pathologic remodeling of the ECM leading to articular  
42 cartilage destruction.

43 In the articular cartilage, and in the growth plate, resting chondrocytes, synthesize an ECM rich in  
44 collagen type II (col2a1) and proteoglycans. In addition to changes in cell morphology, collagen type II  
45 expression decreases during chondrocyte maturation, and the hypertrophic chondrocyte initiates the  
46 synthesis of collagen type X, together with proteolytic enzymes such as matrix metalloproteinase 13  
47 (MMP13) which damage ECM integrity and lead to cartilage destruction (1, 3, 5).

48 Although the mechanisms involved are not fully understood, multiple factors, including matrix  
49 proteins, growth factors like IGF-I or FGF, transcription factors, and intracellular signaling proteins have  
50 been involved in chondrocyte hypertrophy (2)(6-8). Among intracellular signaling pathways, the  
51 MAPK/ERK1/2 pathway can be activated by various stimuli including growth factors, and is involved in  
52 chondrocyte differentiation from the pre-hypertrophic stage to the late hypertrophic stage during EO  
53 (9). Furthermore, the MAPK/ERK1/2 pathway phosphorylates and activates RunX2 (Cbfa1), a master  
54 transcription factor for chondrocyte hypertrophy and an indispensable collagen X transactivator (10)  
55 (11, 12) (13).

56 ShcA (Src Homology and Collagen A) is a cytosolic adaptor protein that binds to the cytoplasmic  
57 tail of growth factor receptors once activated, such as the IGF-I- receptor, the FGF receptor-3 and  
58 integrins (14) (6). ShcA recruitment to the plasma membrane leads to the activation of the  
59 Ras:Raf:MEK1:ERK1/2 pathway. ShcA is expressed in hypertrophic chondrocytes but its precise role  
60 during chondrogenesis remain unknown (15). As ShcA has the potential to signal downstream of  
61 several plasma membrane receptors involved in chondrogenesis, and chondrocyte hypertrophic  
62 differentiation, and upstream of the MEK/ERK1/2 pathway, we hypothesized that it might act as a  
63 checkpoint in chondrocyte differentiation. To study the role of ShcA in chondrocyte differentiation, we  
64 suppressed its expression specifically in chondrocytes using the Cre/lox technology in mice.

65

66

## 67 METHODS

68 **Mice** – All animal experimentations and procedures were approved by the Institutional Animal Care  
69 and Use Committee (IACUC) of the University of Strasbourg, France, and performed conform to the  
70 guidelines from Directive 2010/63/EU of the European Parliament on the protection of animals used  
71 for scientific purposes (authorization APAFIS#15477). C57/B6 mice carrying a ShcA allele into which  
72 loxP sites are integrated have been generated by gene targeting in embryonic stem cells. LoxP sites  
73 have been introduced upstream of exon 2 and downstream of exon 7 (ShcA<sup>fllox/fllox</sup>) (16). Cre-mediated  
74 recombination resulted in deletion of a 2-kb fragment containing the sequence encoding the PTB  
75 domain required for binding to phosphorylated receptors and for signaling activity. Chondrocyte  
76 specific p66, p52 and p46 ShcA inactivation was achieved by crossing transgenic mice carrying the  
77 Twist2-Cre transgene (The Jackson laboratory) with ShcA<sup>fllox/fllox</sup> mice. Genotyping of the wild type  
78 (TwShcA+) and ShcA mutant (TwShcA-) mice by polymerase chain reaction (PCR) was performed as  
79 described using primers specific for ShcA (primers available upon request) (17). Animals were  
80 maintained on a 12-h light/12-h dark cycle. For *in vivo* analysis, one month old mice, three months old  
81 mice or two years old mice were used. For chondrocytes isolation, 8 to 10 days old mice were used.  
82 The agents used for euthanasia were ketamine (750 mg/kg) and xylazine (50 mg/kg), intraperitoneally.

83 **Chondrocyte isolation and culture** - The costal cartilage as well as femoral and tibial articular cartilage  
84 were isolated from TwShcA+ and TwShcA- mice 7 to 10 days after birth and primary murine  
85 chondrocytes from hyaline cartilage were extracted and cultured as previously described (18).

86 **Cells culture and differentiation** - The mouse chondroprogenitor cell line ATDC5 was purchased from  
87 Sigma-Aldrich, maintained in DMEM/F12 medium supplemented with 5% FBS and 2mM L-Glutamine  
88 and incubated in a humidified atmosphere containing 5% CO<sub>2</sub> at 37°C. The primary murine  
89 chondrocytes were used to perform a three dimensional pellet culture model of chondrogenic  
90 differentiation *in vitro* as previously described (20). Briefly, after *ex vivo* expansion and  
91 dedifferentiation (5 passages), 500 000 cells were centrifuged in polypropylene tubes at 500g for 5  
92 minutes. They were incubated in a humidified atmosphere containing 5% CO<sub>2</sub> at 37°C in a  
93 chondrogenic medium containing TGF beta-1 (10 ng/ml) in DMEM medium supplemented with 10%  
94 FBS and 2 mM L-glutamine for up to 2 weeks. Medium was changed every 2-3 days. The primary murine  
95 chondrocytes were also used to perform a two dimensional culture model of hypertrophic  
96 differentiation *in vitro* as previously described (19). Briefly, after *ex vivo* expansion and  
97 dedifferentiation (5 passages), 300 000 cells/well were seeded in 6 well plates. The day after seeding,  
98 they were incubated in a humidified atmosphere containing 5% CO<sub>2</sub> at 37°C in a chondrogenic medium  
99 containing TGF beta-1 (10 ng/ml) (Sigma Aldrich) in DMEM medium supplemented with 10% FBS and  
100 2 mM L-glutamine for up to 2 weeks. Medium was changed every 2-3 days.

101 **Histology and immunostaining experiments** - Mouse joints were isolated and fixed in 4% buffered  
102 formaldehyde (Formalin) for 5 days (one or three month old mice) or 7 days (two years old mice), then  
103 decalcified in 10% (w/v) EDTA disodium (pH 7.4) for 10 days (one or three month old mice) or 21 days  
104 (two years old mice) at room temperature before being embedded in paraffin. Longitudinal joint  
105 sections at 5 µm thickness were processed for Safranin O and Fast Green staining, hematoxylin/eosin  
106 or immunohistochemical staining according to standard methods. For immunohistochemical analysis  
107 the following antibodies were used: rabbit anti-collagen II (AbCam), rabbit anti-collagen X (AbCam),  
108 rabbit anti phospho-ERK1/2 (Cell signaling Technology). The Vectastain kit (Clinisciences) and the DAB  
109 detection system (Clinisciences) were used. The stained specimens were photographed digitally under  
110 a microscope.

111 For quantitative analysis of the hypertrophic zone of the growth plate, images taken through the  
112 microscope were processed using Image J®.

113 To evaluate osteoarthritis severity, two histopathology scorings were applied after Safranin O and Fast  
114 Green staining: the OsteoArthritis Research Society International (OARSI) and the modified Mankin  
115 scoring systems (20,21). The Mankin scoring system assigns grades to histological features  
116 characteristic of OA independently of the location or extent whereas the OARSI attributes stage to the  
117 horizontal extent and grades to the vertical depth within cartilage reflecting the aggressiveness of the  
118 lesions. OARSI scoring system was used in three sections with different depth. Sections were blinded  
119 and scored by three different experienced scientists. Averaged scores were used in statistical analyses.

120 **Western blot** - SDS-polyacrylamide gel electrophoresis and immunoblot analysis were performed  
121 according to standard procedures. Proteins were transferred onto nitrocellulose membranes and  
122 immunoblot analyses were carried out using rabbit antibodies directed against ShcA (Millipore),  
123 Collagen X (Abcam), Collagen II (Abcam), MMP13 (AbCam), phospho ERK ½ (Cell Signaling  
124 Technology), RunX2 (Cell signaling), phospho-YAP1 (ser 127) and YAP1 (Cell Signaling Technology),  
125 GAPDH (Millipore). ImageQuant®LAS 4000 Imaging System (Amersham) was used to visualize  
126 protein expression. Optical densitometry was performed with Adobe Photoshop and Image J®.

127 **Cell fractionation** - Cells were seeded in P100 dishes and, 24 hours after seeding, were transfected  
128 with either scrambled siRNA, or siRNA against p66, p52 and p46 isoforms of ShcA (Dharmacon) at a  
129 final concentration of 100 nM using lipofectamine 3000 (Thermo Fischer Scientific). 48 hours post-  
130 transfection, the cells were fractionated as previously described (22).

131 **Confocal Microscopy** - Primary chondrocytes were seeded on glass slides, and 48 hours later were  
132 fixed with 3% paraformaldehyde, and incubated with anti-RunX2 (Cell signaling Technology), anti-  
133 YAP1 (Cell signaling Technology), anti-IgG control primary antibodies and Alexa Fluor 488 (Fischer  
134 Scientific) secondary antibodies. Immunofluorescence-labeled cells were analyzed using a Leica TSC  
135 SPE confocal microscope with the ×63 oil immersion objective.

136 **Statistical analysis** - Values are reported as mean ± SEM of at least triplicate determinations.  
137 Statistical significance ( $P < 0.05$ ) was determined using an unpaired Student's *t* test (GraphPad  
138 Prism®, *Abacus Concepts, Berkeley, CA*). P-values  $< 0.05$ ,  $< 0.01$ ,  $< 0.001$  and  $< 0.0001$  are identified  
139 with 1, 2, 3 or 4 asterisks, respectively. ns:  $p > 0.05$ .

140

141

## 142 RESULTS

### 143 Specific deletion of ShcA in chondrocytes leads to dwarfism

144 We generated TwShcA<sup>-</sup> mice in which ShcA is selectively ablated in chondrocytes by breeding Twist2  
145 transgenic mice with ShcA<sup>fl<sup>ox</sup>/fl<sup>ox</sup></sup> mice (16). In TwShcA<sup>-</sup> mice, the three isoforms of ShcA were efficiently  
146 reduced in chondrocytes isolated from knee articular cartilage, vertebral and costal cartilage but not  
147 in non-cartilaginous tissues like lungs or the spleen (supplemental figure A and B). TwShcA<sup>-</sup> mice  
148 showed a dwarfism phenotype with a decrease in body size compared to control littermates  
149 (TwShcA<sup>+</sup>), (-25,4 +/- 1,3 %, p< 0,001) as well as in body weight (25,6 +/- 0,8 g TwShcA<sup>+</sup> versus 19,1 +/-  
150 0,9 g TwShcA<sup>-</sup>, p< 0,001), and tibial length (-30,6 +/- 1,4 %, p< 0,0001) at 12 weeks of age (figure 1A  
151 and D). Vertebral bodies and hind and front legs lengths were also significantly decreased at 12 weeks  
152 of age (figure 1A and B).

153 Alizarin red staining for bone tissue and alcian blue staining for cartilage tissue showed an increased  
154 cartilage-to-bone ratio in the rib cage and the spine from TwShcA<sup>-</sup> mice compared to TwShcA<sup>+</sup> mice  
155 (figure 1B). Histological analysis of safranin O- and hematoxylin-eosin-stained tibial growth plates  
156 indicated a disorganized, non-columnar proliferating chondrocytes zone and a shorter hypertrophic  
157 chondrocytes zone in one month old mice ( $61.14 \pm 7,610 \mu\text{m}^2$  in TwShcA<sup>+</sup> versus  $31.54 \pm 5.205 \mu\text{m}^2$  in  
158 TwShcA<sup>-</sup> mice, p<0,05) (Figure 1C and D). A similar decrease in the hypertrophic zone was observed in  
159 vertebral growth plates (supplemental figure C).

160 These data are indicative of an altered EO process and suggest that ShcA is required for chondrocyte  
161 terminal maturation towards hypertrophy.

### 162 ShcA drives chondrocyte maturation to hypertrophy and collagen X expression

163 When primary chondrocytes isolated from hyaline cartilage are expanded in monolayer, they typically  
164 dedifferentiate and acquire a fibroblast-like phenotype (18). These fibroblast-like cells can be  
165 redifferentiated using chondrogenic differentiation protocols either in monolayer culture or in pellet  
166 culture (19). Using such protocols, we observed that, after dedifferentiation, chondrocytes isolated  
167 from TwShcA<sup>-</sup> mice are less prone to hypertrophic commitment than those isolated from TwShcA<sup>+</sup>  
168 mice as shown by the decrease in the alizarin red stained mineralized matrix (Figure 2A). There are less  
169 hypertrophic chondrocytes in the pellet culture of chondrocytes isolated from TwShcA<sup>-</sup> mice compared  
170 to those from TwShcA<sup>+</sup> mice (Figure 2B, safranin O staining). Also, the immunological staining of the  
171 pellets shows a decrease in collagen X staining, the main marker of hypertrophy, in chondrocytes  
172 isolated from TwShcA<sup>-</sup> mice compared to those from TwShcA<sup>+</sup> mice (Figure 2B). These *in vitro* data  
173 indicate a role for ShcA in controlling chondrocyte hypertrophic commitment.

174 Collagen X is an ECM protein specifically synthesized by hypertrophic chondrocytes whereas collagen  
175 II is an ECM protein synthesized by quiescent chondrocytes (23, 24). Immuno-histological analysis of  
176 tibial growth plates sections from one month old mice indicated a marked decrease in collagen X  
177 staining as well as an increase in collagen II staining in TwShcA<sup>-</sup> mice compared to TwShcA<sup>+</sup> mice  
178 (Figure 2C). In femoral articular cartilage from one year old mice, immunostaining of collagen X and  
179 the number of hypertrophic chondrocytes were decreased whereas immunostaining of collagen II was  
180 increased in TwShcA<sup>-</sup> mice compared to TwShcA<sup>+</sup> mice (Figure 2C). Quantifications of collagen X and  
181 collagen II expressions show that collagen X was decreased by 40% in chondrocytes isolated from  
182 TwShcA<sup>-</sup> mice knee joint cartilage (1 versus  $0.6 \pm 0.05$ , TwShcA<sup>+</sup> versus TwShcA<sup>-</sup> mice, p<0.0001)



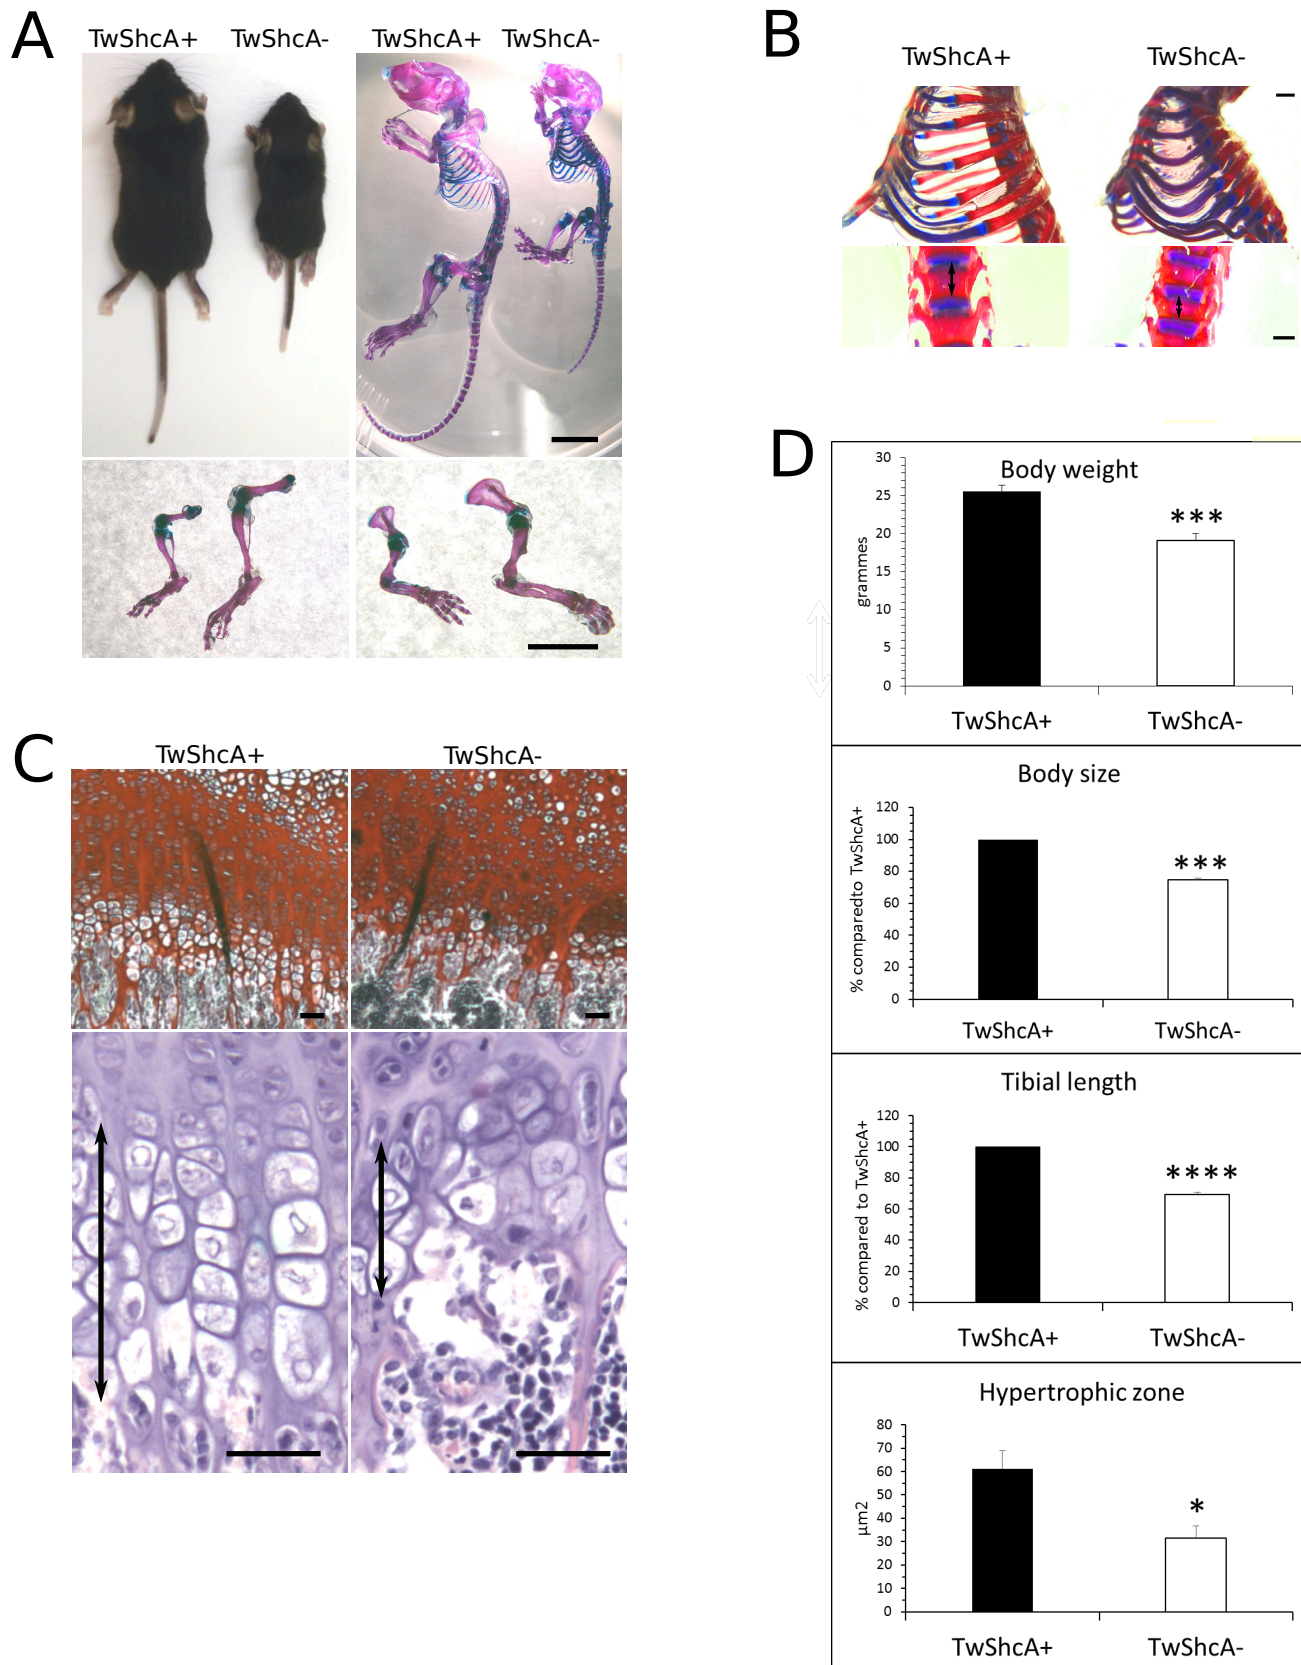

**FIGURE 1: Dwarfism phenotype and decreased hypertrophic chondrocyte maturation in growth plate from TwShcA- mice.** A) Representative body appearance and alizarin red- and alcian blue-stained bone and cartilage (upper panel) and alizarin red- and alcian blue-stained hind legs (lower left panel) and front legs (lower right panel) in mice that express (TwShcA+) or lack ShcA in chondrocytes (TwShcA-). Scale bars 10 mm. B) Alizarin red- and alcian blue-stained rib cage (upper panel) and spine (lower panel) from mice that express (TwShcA+) or lack ShcA (TwShcA-) in chondrocytes. White double headed arrow: alizarin-stained vertebral bone. Scale bars 1 mm. C) Safranin O-fast green (upper panel) and hematoxylin/eosin (lower panel) stainings of tibial growth plate from mice that express (TwShcA+) or lack ShcA in chondrocytes (TwShcA-). Black double headed arrow: hypertrophic zone. Scale bars 100 μm. D) Quantification of body weight, size, tibial length and growth plate surface of mice that express (TwShcA+) or lack ShcA in chondrocytes (TwShcA-) (n= 7 mice in each group). \* p< 0.05 \*\*\* p< 0.001 \*\*\*\* p>0.0001. Values are mean ± s.e.m. Two-tailed unpaired Student's t-test.

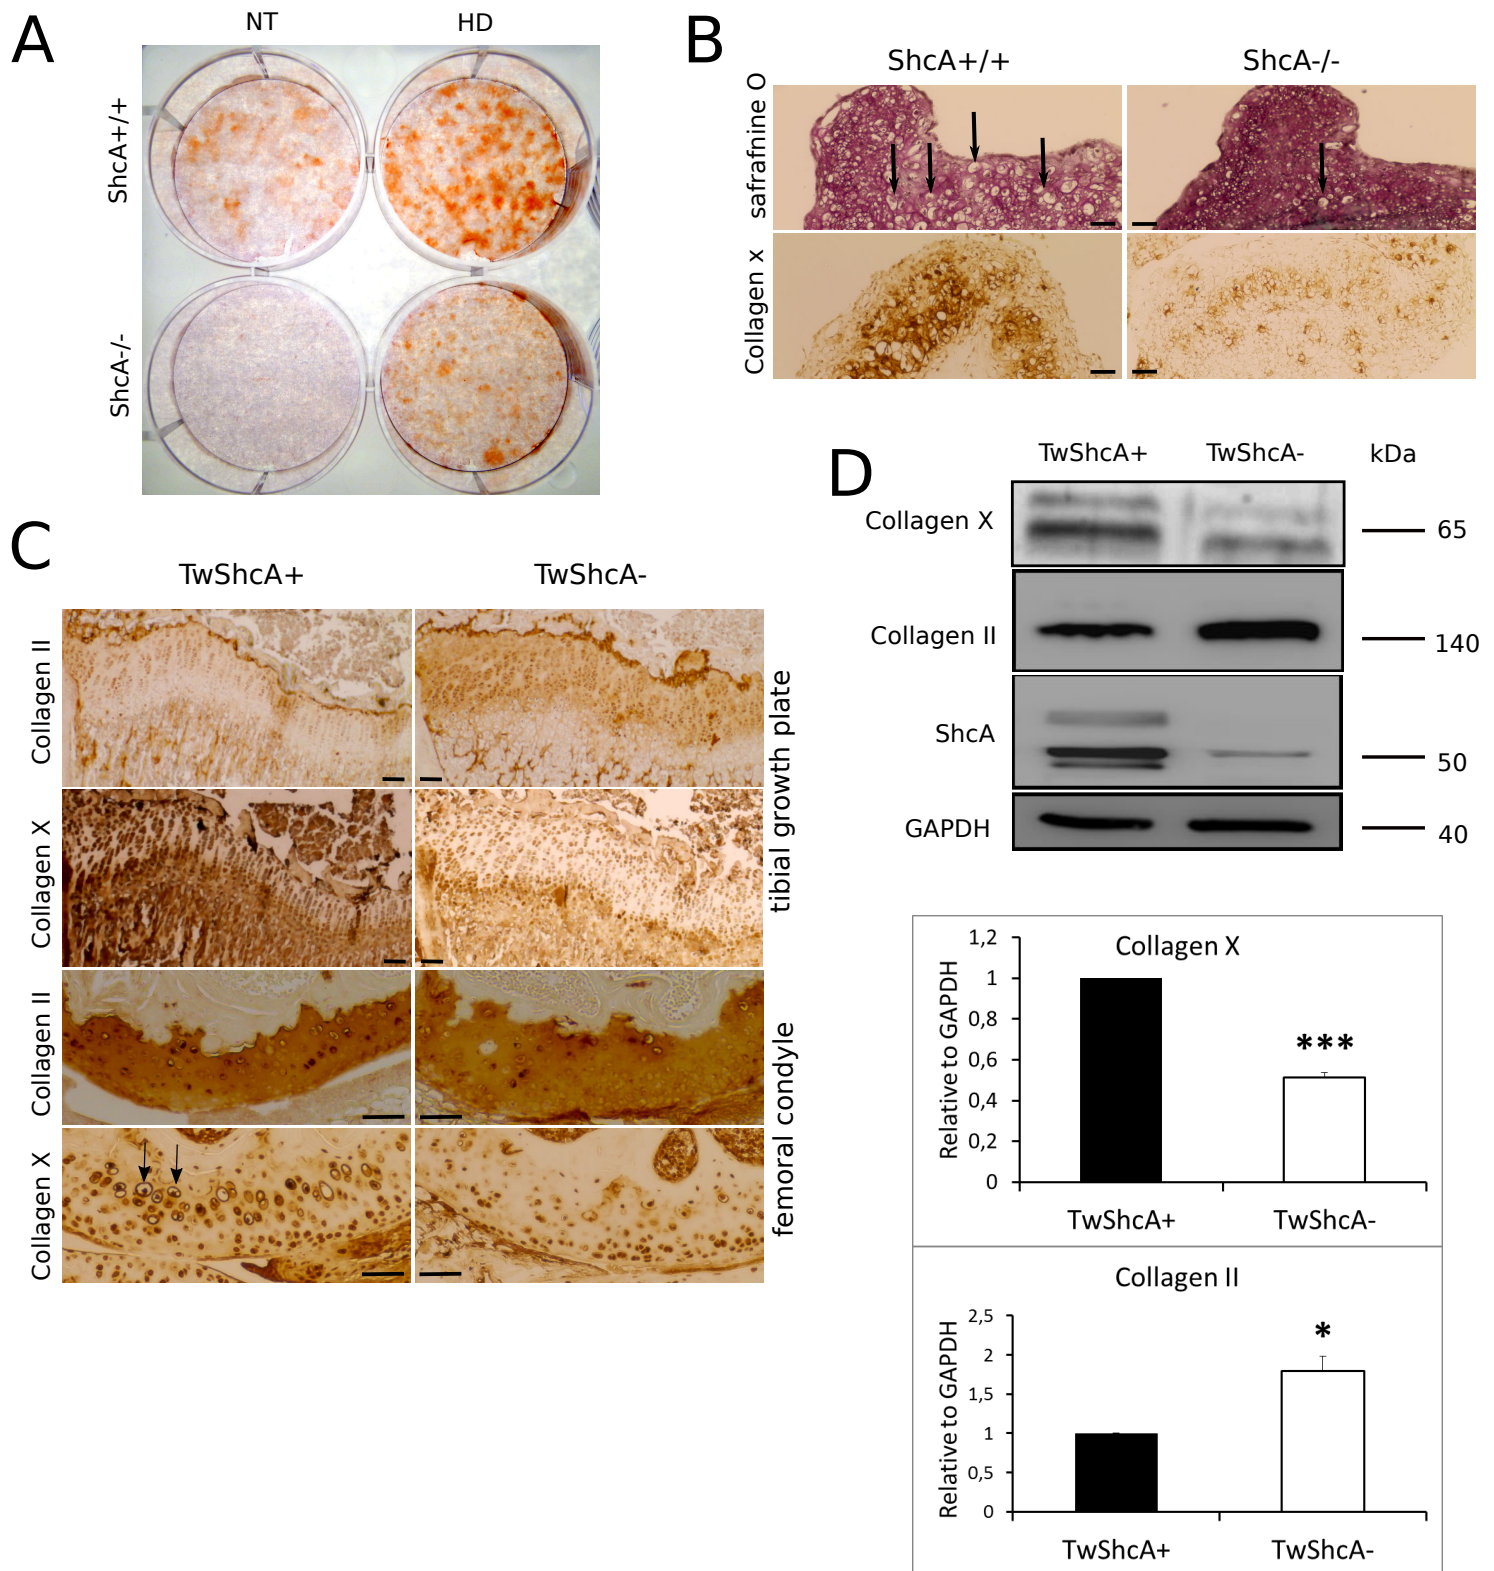

**FIGURE 2: Decreased hypertrophic chondrocyte maturation and collagen X expression in TwShcA- mice and ShcA deficient cells.** A) Alizarin red staining of articular chondrocytes isolated from mice that express (ShcA+/+) or lack ShcA in chondrocytes (ShcA-/-) submitted (HD) or not (NT) to an hypertrophic environment. B) Safranin O and collagen X staining of three dimensional pellet culture of articular chondrocytes isolated from mice that express (ShcA+/+) or lack ShcA in chondrocytes (ShcA-/-). Arrows show hypertrophic chondrocytes. Scale bars 100  $\mu$ m. C) Collagen II and Collagen X staining of tibial growth plate (upper panels) and femoral condyle articular cartilage (lower panels) in mice that express (TwShcA+) or lack ShcA in chondrocytes (TwShcA-). Arrows show hypertrophic chondrocytes. Scale bars 100  $\mu$ m. D) Western-blot analysis and relative quantification of collagen X and collagen II protein levels in knee joint articular chondrocytes isolated from mice that express (TwShcA+) or lack ShcA in chondrocytes (TwShcA-) (n= 7 in each group for collagen x, n=5 in each group for collagen II).



183 whereas collagen II expression was significantly increased (1 *versus*  $1.8 \pm 0.19$ , in TwShcA+ *versus*  
184 TwShcA- mice,  $p < 0.01$ ) (Figure 2D).

185 Not all hypertrophic markers were downregulated in ShcA-deficient chondrocytes as the expression of  
186 MMP13 was not significantly different between chondrocytes from TwShcA+ and TwShcA- mice (1  
187 *versus*  $1.2 \pm 0.24$ , NS) (Supplemental figure D). The matrix protease MMP13 is a late hypertrophic  
188 marker (25), suggesting that ShcA is involved in the earlier stages of hypertrophic differentiation.

189 Thus, the decrease of the hypertrophic marker collagen X parallels the inhibition of chondrocyte  
190 hypertrophic commitment in the absence of ShcA.

191 **ShcA induces hypertrophic commitment by promoting ERK1/2 activation, RunX2 nuclear**  
192 **translocation and by retaining YAP1 in its cytosolic inactive phosphorylated form**

193 One of the main downstream target of ShcA is ERK1/2 (14). It has been reported that the MAPK/ERK1/2  
194 pathway promotes chondrocytes differentiation from the pre-hypertrophic to the late hypertrophic  
195 stage during endochondral ossification (9). Once activated ERK1/2 phosphorylates and activates Runx2  
196 in osteoblasts (10). Runx2 and its target gene collagen X are essential for chondrocyte hypertrophy  
197 (11, 13). Thus, by activating ERK1/2, ShcA might induce RunX2 activation leading to Collagen X  
198 expression and chondrocyte hypertrophic commitment.

199 To test this, we first quantified ERK1/2 phosphorylation in primary chondrocytes isolated from knee  
200 joint cartilage. We found that the deletion of ShcA leads to a marked decrease in p-ERK1/2 compared  
201 to controls (1 *versus*  $0.51 \pm 0.06$ ,  $p < 0.01$ ) (Figure 3A). A 50% decrease in the expression of phospho-  
202 ERK1/2 was also observed *in vivo* in tibial growth plate hypertrophic chondrocytes from one month  
203 old TwShcA- mice (Figure 3B). In columnar proliferating chondrocytes, the decrease was observed to  
204 a lesser extent (Figure 3B).

205 We next tested whether ShcA promotes Runx2 nuclear translocation. Using cell fractionation and  
206 immuno-fluorescence experiments in primary chondrocytes isolated from knee joint cartilage of  
207 TwShcA+ and TwShcA- mice, we found a marked decrease in RunX2 expression in the nucleus in ShcA  
208 deficient cells (1 *versus*  $0.45 \pm 0.12$ ,  $p < 0.01$ , cell fractionation) (Figure 3A) and a decreased nuclear  
209 staining of RunX2 in ShcA deficient cells (Figure 3C, confocal microscopy). This indicate that ShcA is  
210 required for RunX2 nuclear translocation in chondrocytes.

211 YAP1 is a transcriptional effector of the Hippo pathway. In cells, YAP1 is present in a cytosolic Ser/Thr  
212 phosphorylated inactive form (p-YAP1), whereas in the nucleus YAP1 regulate transcription (27).  
213 Because YAP1 can bind to RunX2 and suppresses collagen X transcription (26, 27), we tested whether  
214 ShcA retains p-YAP1 in the cytosol and thus prevents its nuclear translocation. Using primary  
215 chondrocytes isolated from knee joint cartilage of TwShcA+ and TwShcA- mice, we found a significant  
216 decrease in p-YAP1 expression in ShcA deficient cells (1 *versus*  $0.54 \pm 0.12$ ,  $p < 0.01$ ) (Figure 3A). We also  
217 tested YAP1 activation by its nuclear translocation in presence or absence of ShcA. Using cell  
218 fractionation and immuno-fluorescence experiments we found a marked increase in YAP1 nuclear  
219 translocation in ShcA deficient cells (1 *versus*  $2.0 \pm 0.31$ ,  $p < 0.05$ ) (Figure 3D) and a marked staining of  
220 YAP1 in the nucleus of ShcA deficient cells (Figure 3C).



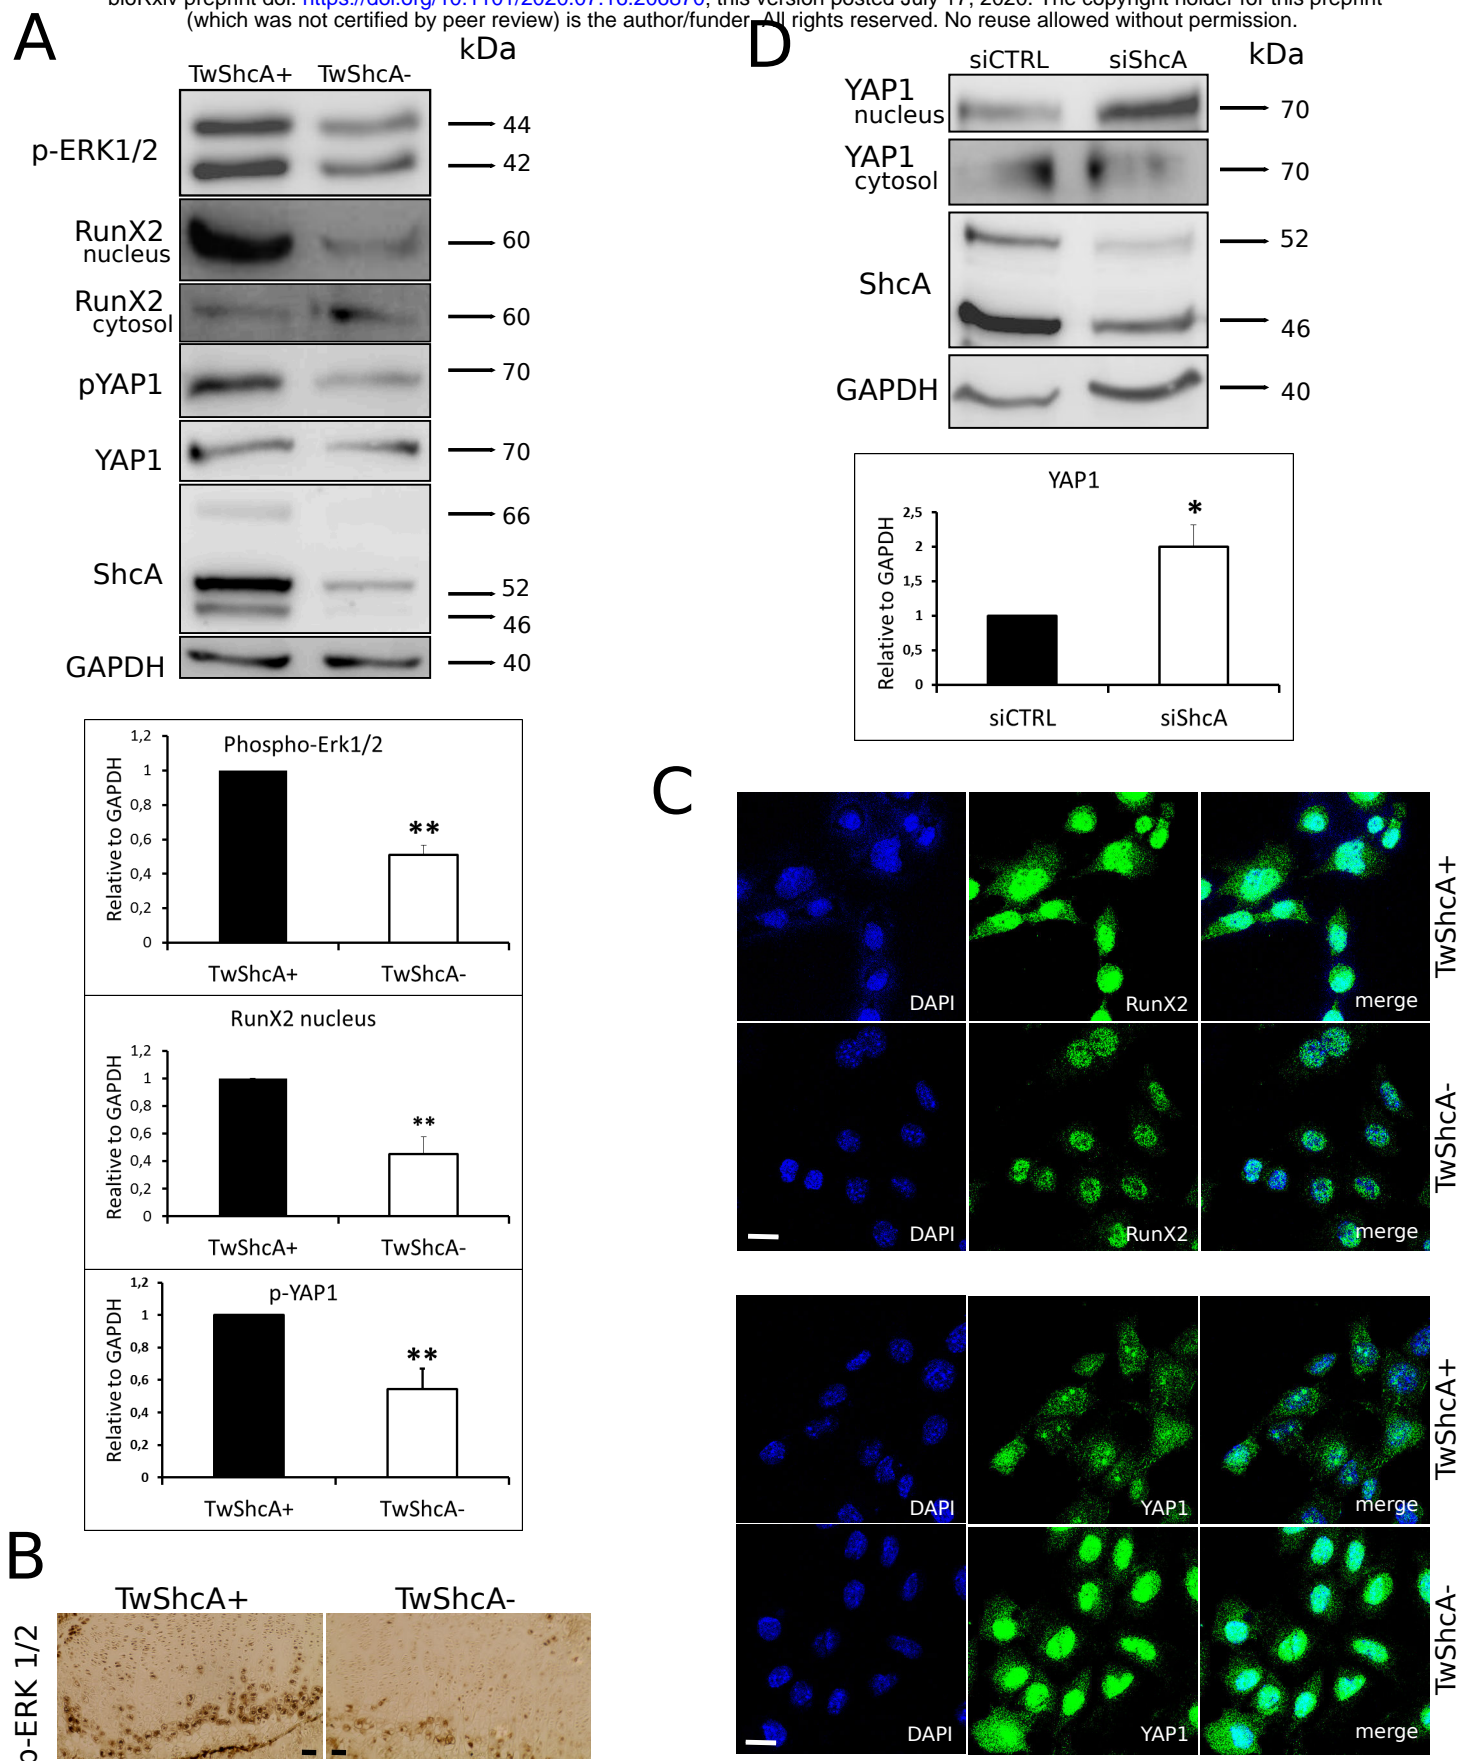

**FIGURE 3: Decreased ERK1/2 and RunX2 activation and increased YAP1 activation in TwShcA- mice and ShcA deficient cells.** A) Western blot analysis and relative quantification of phospho-ERK1/2, nuclear and cytosolic RunX2, phospho-YAP1, YAP1, ShcA and GAPDH proteins levels in knee joint articular chondrocytes isolated from mice that express (TwShcA+) or lack ShcA in chondrocytes (TwShcA-) (n= 8 mice in each group for phospho-ERK1/2 ShcA, n= 5 mice in each group for RunX2, phospho-YAP1, YAP1). B) phospho-ERK1/2 staining of tibial growth plate in mice that express (TwShcA+) or lack ShcA in chondrocytes (TwShcA-). Scale bars 100  $\mu$ m. C) Representative confocal immunostaining of RunX2 (upper panel) and YAP1 (lower panel) in articular chondrocytes isolated from mice that express (TwShcA+) or lack ShcA in chondrocytes (TwShcA-) (n= 3 separate experiments). Scale bars 10  $\mu$ m. D) Western-blot analysis and relative quantification of nuclear and cytosolic YAP1 protein levels in ATDC5 cells down-regulated for ShcA (siShcA) and control cells (siCTRL) (n= 4 experiments in each group). \*p<0.05, \*\*p<0.001. Values are mean  $\pm$  s.e.m. Two-tailed unpaired Student's t-test.

221 Taken together, our results show that ShcA controls hypertrophic differentiation and collagen X  
222 expression by promoting ERK1/2 activation and RunX2 nuclear translocation, and by retaining YAP1 in  
223 its cytosolic inactive phosphorylated form.

#### 224 **ShcA deletion in chondrocytes protects from aged-related OA development in mice**

225 Aberrant terminal hypertrophic differentiation of articular chondrocytes has been implicated as a  
226 crucial step in OA pathogenesis (3, 4). During OA, articular chondrocytes change their phenotype to  
227 one resembling hypertrophic growth plate chondrocytes and OA can be regarded as an ectopic  
228 recapitulation of the endochondral ossification process (3, 4, 28).

229 Because ShcA promotes hypertrophic commitment, we tested whether its deletion protects against  
230 OA in aged TwShcA<sup>-</sup> mice compared to young TwShcA<sup>-</sup> mice. As mice of the C<sub>57</sub>BL/6 background are  
231 characterized by a determined propensity to develop spontaneous OA with age (29, 30), the TwShcA<sup>-</sup>  
232 mice were backcrossed on a C<sub>57</sub>BL/6 genetic background.

233 We then characterized the effect of ShcA deletion on spontaneous aged-induced OA development.  
234 Safranin O fast green staining of tibio-femoral joints showed a slightly increased glycosaminoglycan  
235 staining of tibial plateau and femoral condyle in one year old TwshcA<sup>-</sup> mice compared to TwShcA<sup>+</sup>  
236 mice (Figure 4A). With aging, knee joints from TwShcA<sup>+</sup> mice demonstrated erosion with loss of  
237 articular cartilage tissue staining, including in superficial and in at least portions of deeper cartilage  
238 layers, denudation, with matrix loss extending to calcified cartilage interface, and clefts to calcified  
239 zone (Figure 4B). Cartilage histopathology scorings, according to the OARSI and the modified Mankin  
240 scoring systems, showed a drastic increase in two years old TwShcA<sup>+</sup> mice compared to young mice  
241 (OARSI :  $12.5 \pm 2.24$  *versus* 0, Modified Mankin :  $7.0 \pm 0.89$  *versus* 0, aged *versus* young mice), which  
242 validated the age-related development of osteoarthritic lesions.

243 Cartilage histopathology scorings also showed a significant increase in aged TwShcA<sup>-</sup> mice compared  
244 to young TwShcA<sup>-</sup> mice, however the impairment of the cartilage tissue was substantially decreased  
245 compared to TwShcA<sup>+</sup> mice at the same age (OARSI :  $12.5 \pm 2.2$  *versus*  $4.1 \pm 1.3$ ,  $p < 0.05$ ; modified  
246 Mankin :  $7.0 \pm 0.9$  *versus*  $3.6 \pm 1.1$ ,  $p < 0.05$ , two years old TwShcA<sup>+</sup> mice *versus* two years old TwShcA<sup>-</sup>  
247 mice).

248 These data indicate that ShcA promotes aged-related cartilage destruction and that deletion of ShcA  
249 in chondrocytes can slow down OA development in mice.

250

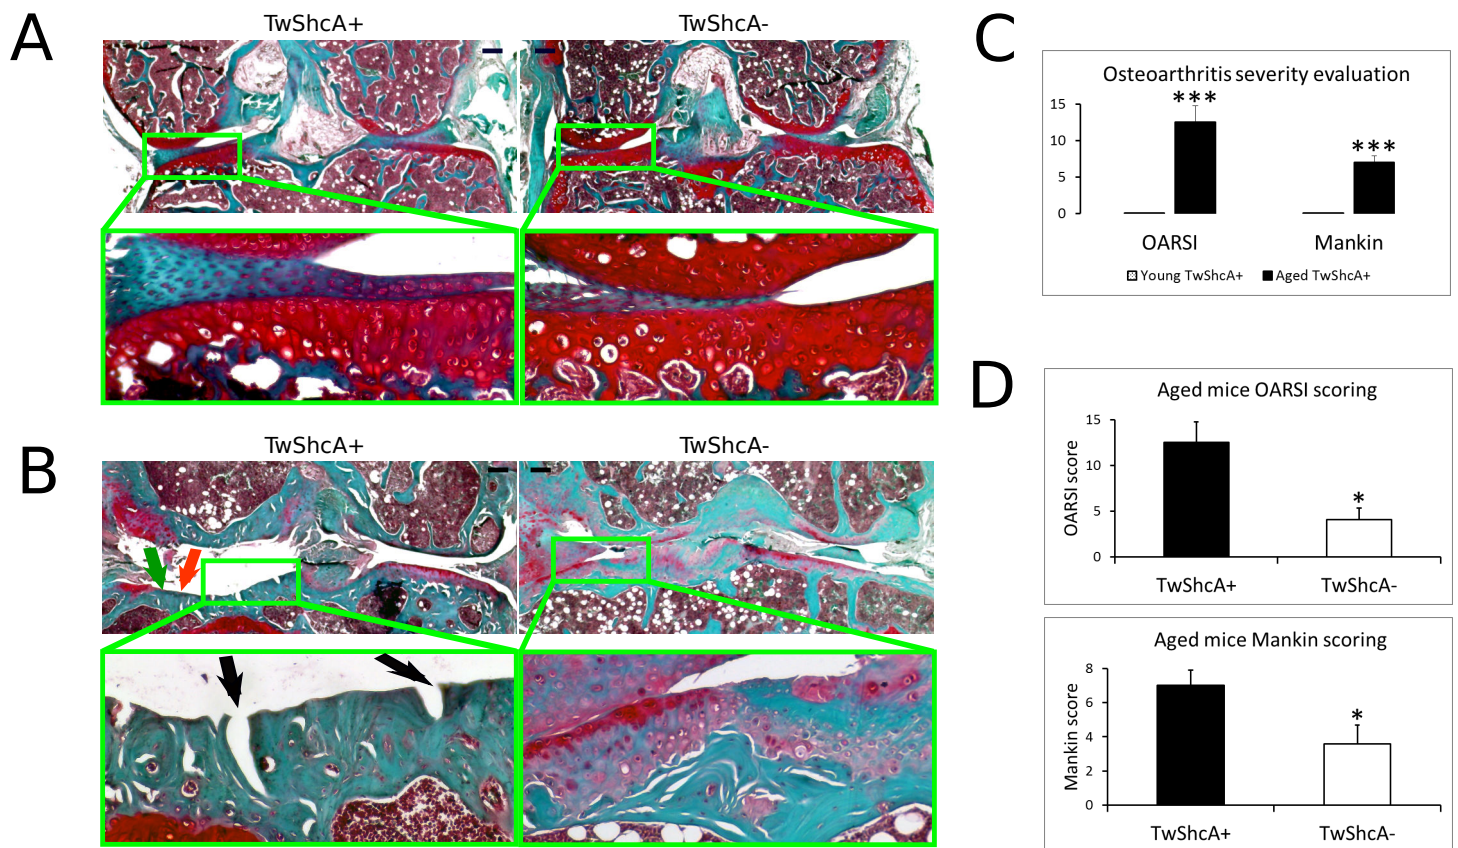

**FIGURE 4: Inhibition of OA development in TwShcA- mice. Safranin O fast green staining of knee joint from one month old (A) and two years old (B) TwShcA+ and TwShcA- mice. Scale bars 250  $\mu$ m (upper panels) 100  $\mu$ m (lower panels). Green arrow: loss of articular cartilage, orange arrow: denudation of cartilage surface, black arrows: clefts to calcified zone. n= 5 mice in each group.**

# SUPPLEMENTAL FIGURE

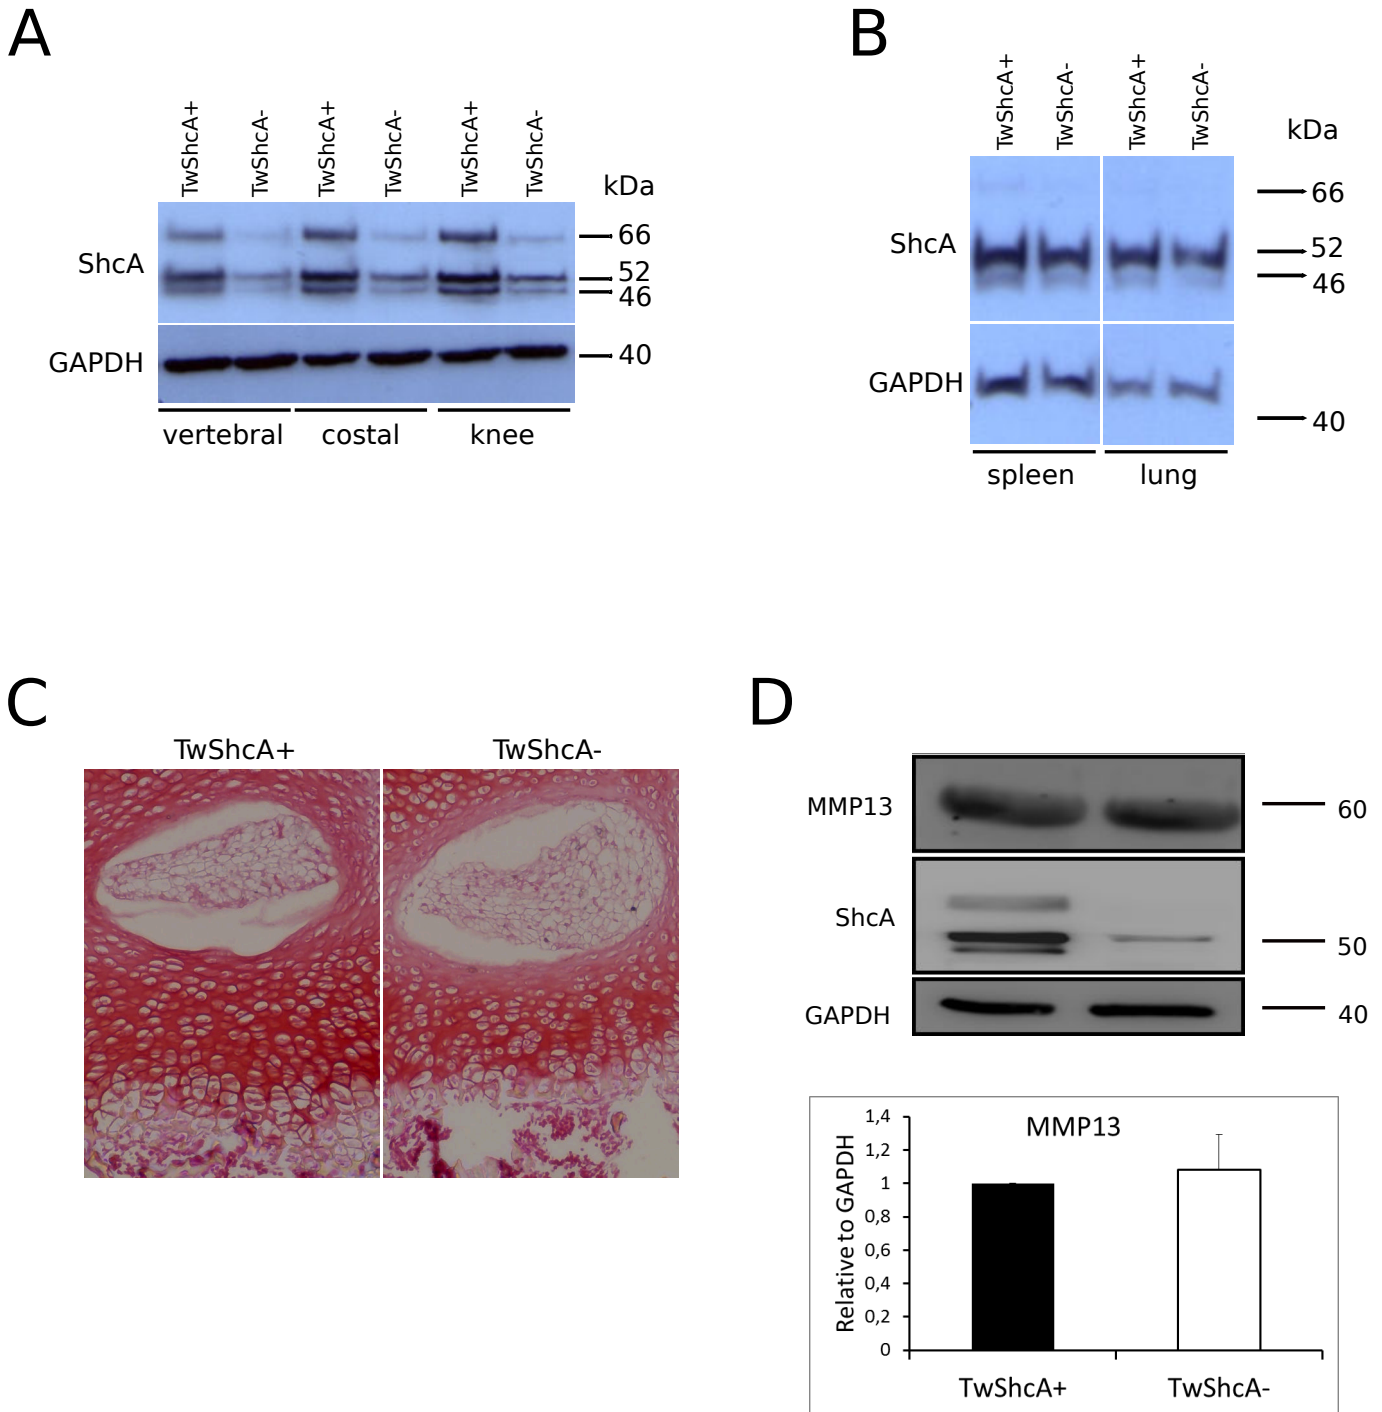

A) Expression of ShcA in vertebral, costal and knee articular cartilage from mice that express (TwShcA+) or lack ShcA in chondrocytes (TwShcA-). Primary chondrocytes were isolated from cartilage tissue of 8 to 10 days old TwShc+ and TwShcA- mice. B) Expression of ShcA in the spleen and lungs from TwShcA and TwShcA mice. Tissues were isolated from 3 months old TwShcA+ and TwShcA- mice. C) Decrease in the hypertrophic zone surface of vertebral cartilage in TwShcA- mice compared to TwShcA+ mice. D) Western-blot analysis and relative quantification of MMP13 protein levels in knee joint articular chondrocytes isolated from mice that express (TwShcA+) or lack ShcA (TwShcA-) in chondrocytes (n=4 in each group for MMP13).



## 251 DISCUSSION

252 Integrins and numerous growth factors receptors are involved in chondrogenesis and terminal  
253 hypertrophic chondrocyte differentiation (2, 6-8). ShcA is a ubiquitously expressed adaptor protein  
254 that binds to the cytoplasmic tail of integrins and growth factor receptors once activated (14).  
255 Subsequently ShcA recruits and activates the Grb2:Sos:Ras:Raf:MEK1/2:ERK1/2 signaling cascade (14).  
256 Even if ShcA has been identified in hypertrophic chondrocytes, its function in chondrocyte  
257 differentiation has never been addressed. By its potential to integrate multiple extracellular stimuli  
258 ShcA may behave as an important regulator of chondrocyte differentiation. Our data indicate that  
259 specific deletion of ShcA in chondrocytes leads to a reduced cartilage-to-bone ratio and a dwarfism in  
260 mice. This phenotype is characterized by an altered EO process with an important inhibition of  
261 chondrocyte hypertrophic maturation in the growth plate. *In vitro* experiments confirmed the crucial  
262 role of ShcA in promoting chondrocyte maturation to hypertrophy. ShcA promotes chondrocyte  
263 hypertrophic commitment and osteoarthritis through RunX2 activation and YAP1 inhibition.

264 During hypertrophic maturation, chondrocyte-synthesized ECM changes, and while collagen II  
265 synthesis is lost, the expression of collagen X is initiated, along with MMP13 synthesis creating a  
266 favorable environment for mineralization and replacement of cartilage by bone (1) (31) (32). In the  
267 absence of ShcA, we observed a decrease in collagen X expression both in the growth plate and the  
268 articular cartilage from adult mice, but no decrease in collagen II expression. Instead, the expression  
269 of collagen II was increased. Thus, not only are ShcA-deficient chondrocytes refrained from undergoing  
270 hypertrophic differentiation but also they exhibit the collagen II marker of quiescence.

271 ERK1/2 is one of the main downstream targets of ShcA (14). Conditional deletion of ERK1/2 in  
272 hypertrophic chondrocyte leads to a decrease in long bones growth after birth and to an inhibition of  
273 the transition of early hypertrophic chondrocytes to terminally differentiated chondrocytes (9). We  
274 found that upon ShcA knockdown, the phosphorylation of ERK1/2 is decreased in chondrocytes.  
275 Interestingly, the decrease in ERK1/2 phosphorylation is mainly observed in hypertrophic chondrocytes  
276 from the growth plate and to a lesser extent in columnar proliferating chondrocytes. It has been  
277 reported that the main role of ERK1/2 in cartilage is to stimulate not cell proliferation but rather  
278 chondrocyte maturation and hypertrophic differentiation, and that c-Raf may be responsible for  
279 ERK1/2 activation in hypertrophic chondrocytes (9, 33). Our results demonstrate that upstream of c-  
280 Raf, ShcA is necessary to activate ERK1/2, a determinant factor for hypertrophic differentiation.

281 Runx2 has been implicated as a master transcription factor for chondrocyte hypertrophy (11). After its  
282 nuclear translocation, RunX2 can be phosphorylated and activated by ERK1/2 leading to its binding to  
283 the Collagen X promoter and transcriptional activation (10, 13, 34). We found that the decreased  
284 activation of ERK1/2 in ShcA-deficient chondrocytes correlates with a decreased nuclear translocation  
285 of RunX2. Taken together these observations suggest that ShcA activates chondrocyte hypertrophic  
286 differentiation and collagen X expression by activating ERK1/2 and by promoting RunX2 nuclear  
287 translocation. We cannot rule out the participation of other signaling pathways in RunX2 activation.  
288 Indeed, the mammalian Ste20-like kinase (MST) pathway or Hippo pathway was reported to inhibit  
289 RunX2 activation by phosphorylation of its serine 339 and 370 residues (35). And MST 1/2 kinases are  
290 negatively regulated by c-Raf (36). Hence, upstream of Raf, ShcA might also activate RunX2 by  
291 controlling a c-Raf-MST1/2 pathway.

292 Our study also reveals that not only ShcA drives chondrocyte maturation to hypertrophy by positively  
293 activating ERK1/2 and RunX2 but also by negatively regulating YAP1. We report that upon ShcA  
294 knockdown, the cytoplasmic inactive form of YAP1 is decreased and YAP1 nuclear translocation is  
295 increased. It has been shown that YAP1 can inhibit collagen X expression by a direct interaction with  
296 RunX2 (26, 27).

297 Our data highlight the crucial role of ShcA in regulating the nuclear access of the transcription factor  
298 RunX2 and its regulator YAP1 to control protein expression. In chondrocytes, we found that ShcA  
299 retains YAP1 in its inactive form in the cytoplasm while promoting ERK1/2 activation and RunX2 nuclear  
300 translocation. RunX2 nuclear translocation activates hypertrophic commitment and collagen X  
301 transcription. The ShcA-mediated retention of YAP1 in the cytoplasm might involve the formation of a  
302 ShcA-Grb2-YAP1 complex. Indeed, it has been described that YAP1 is able to interact with SH3 domain-  
303 containing proteins through its WW domain (37). Grb2 contains such a SH3 domain and is able to bind  
304 ShcA through its SH2 domain (38, 39).

305 Aberrant terminal hypertrophic differentiation of articular chondrocytes has been implicated as a  
306 crucial step in OA pathogenesis (3, 4). During this switch, articular chondrocytes change their  
307 phenotype to one resembling hypertrophic growth plate chondrocytes and OA can be regarded as an  
308 ectopic recapitulation of the endochondral ossification process (3, 4, 28). Our results show that the  
309 ShcA-controlled hypertrophic differentiation is also a mechanism involved in aged-related  
310 osteoarthritis development in mice. Chondrocyte specific ShcA-deficient mice are refrained from  
311 severe osteoarthritis.

312 Several initial events are involved in chondrocyte differentiation towards hypertrophy, i.e. mechanical  
313 stimuli through integrins or DDR2, growth factors receptors or LRP5/6 activation (40, 41). ShcA  
314 potentially binds to the cytoplasmic tail of these receptors (42) (14)(6). Our results reveal that ShcA  
315 behaves as a major regulator to integrate multiple stimuli and to complete the whole intracellular  
316 signaling process leading to hypertrophic commitment either in physiological processes like skeletal  
317 growth or in a pathological process like OA. By its potential to lock chondrocytes in a desired  
318 differentiation stage and to stop inadvertent hypertrophic differentiation, ShcA might represent an  
319 interesting therapeutic target in OA and cartilage tissue engineering.

320

321

## 322 **ACKNOWLEDGEMENTS**

323 We are grateful to Brigitte Pollet and Lionel Host (UMR CNRS 7021) for technical assistance. This study  
324 was supported by grants from Société Française de Rhumatologie.

## BIBLIOGRAPHY

1. Kronenberg HM. Developmental regulation of the growth plate. *Nature*. 2003;423(6937):332-6.
2. Kozhemyakina E, Lassar AB, and Zelzer E. A pathway to bone: signaling molecules and transcription factors involved in chondrocyte development and maturation. *Development*. 2015;142(5):817-31.
3. Pitsillides AA, and Beier F. Cartilage biology in osteoarthritis--lessons from developmental biology. *Nature reviews Rheumatology*. 2011;7(11):654-63.
4. van der Kraan PM, and van den Berg WB. Chondrocyte hypertrophy and osteoarthritis: role in initiation and progression of cartilage degeneration? *Osteoarthritis and cartilage / OARS, Osteoarthritis Research Society*. 2012;20(3):223-32.
5. Troeberg L, and Nagase H. Proteases involved in cartilage matrix degradation in osteoarthritis. *Biochimica et biophysica acta*. 2012;1824(1):133-45.
6. Vainikka S, Joukov V, Wennstrom S, Bergman M, Pelicci PG, and Alitalo K. Signal transduction by fibroblast growth factor receptor-4 (FGFR-4). Comparison with FGFR-1. *The Journal of biological chemistry*. 1994;269(28):18320-6.
7. Liu JP, Baker J, Perkins AS, Robertson EJ, and Efstratiadis A. Mice carrying null mutations of the genes encoding insulin-like growth factor I (Igf-1) and type 1 IGF receptor (Igf1r). *Cell*. 1993;75(1):59-72.
8. Cooper KL, Oh S, Sung Y, Dasari RR, Kirschner MW, and Tabin CJ. Multiple phases of chondrocyte enlargement underlie differences in skeletal proportions. *Nature*. 2013;495(7441):375-8.
9. Chen Z, Yue SX, Zhou G, Greenfield EM, and Murakami S. ERK1 and ERK2 regulate chondrocyte terminal differentiation during endochondral bone formation. *Journal of bone and mineral research : the official journal of the American Society for Bone and Mineral Research*. 2015;30(5):765-74.
10. Xiao G, Jiang D, Thomas P, Benson MD, Guan K, Karsenty G, et al. MAPK pathways activate and phosphorylate the osteoblast-specific transcription factor, Cbfa1. *The Journal of biological chemistry*. 2000;275(6):4453-9.
11. Otto F, Thornell AP, Crompton T, Denzel A, Gilmour KC, Rosewell IR, et al. Cbfa1, a candidate gene for cleidocranial dysplasia syndrome, is essential for osteoblast differentiation and bone development. *Cell*. 1997;89(5):765-71.
12. Lee B, Thirunavukkarasu K, Zhou L, Pastore L, Baldini A, Hecht J, et al. Missense mutations abolishing DNA binding of the osteoblast-specific transcription factor OSF2/CBFA1 in cleidocranial dysplasia. *Nature genetics*. 1997;16(3):307-10.
13. Zheng Q, Zhou G, Morello R, Chen Y, Garcia-Rojas X, and Lee B. Type X collagen gene regulation by Runx2 contributes directly to its hypertrophic chondrocyte-specific expression in vivo. *The Journal of cell biology*. 2003;162(5):833-42.
14. Wills MK, and Jones N. Teaching an old dogma new tricks: twenty years of Shc adaptor signalling. *The Biochemical journal*. 2012;447(1):1-16.
15. Hawley SP, Wills MK, Rabalski AJ, Bendall AJ, and Jones N. Expression patterns of ShcD and Shc family adaptor proteins during mouse embryonic development. *Developmental dynamics : an official publication of the American Association of Anatomists*. 2011;240(1):221-31.
16. Mlih M, Host L, Martin S, Niederhoffer N, Monassier L, Terrand J, et al. The Src Homology and Collagen A (ShcA) Adaptor Protein Is Required for the Spatial Organization of the Costamere/Z-disk Network during Heart Development. *The Journal of biological chemistry*. 2015;290(4):2419-30.

17. Boucher P, Gotthardt M, Li WP, Anderson RG, and Herz J. LRP: role in vascular wall integrity and protection from atherosclerosis. *Science*. 2003;300(5617):329-32.
18. Gosset M, Berenbaum F, Thirion S, and Jacques C. Primary culture and phenotyping of murine chondrocytes. *Nature protocols*. 2008;3(8):1253-60.
19. Caron MM, Emans PJ, Coolen MM, Voss L, Surtel DA, Cremers A, et al. Redifferentiation of dedifferentiated human articular chondrocytes: comparison of 2D and 3D cultures. *Osteoarthritis and cartilage / OARS, Osteoarthritis Research Society*. 2012;20(10):1170-8.
20. Pritzker KPH, Gay S, Jimenez SA, Ostergaard K, Pelletier JP, et al. Osteoarthritis cartilage histopathology: grading and staging. *Osteoarthritis and cartilage / OARS, Osteoarthritis Research Society*. 2006;14(1):13-29.
21. Xu L, Polur I, Lim C, Servais JM, Dobeck J, Li Y, Olsen BR. Early-onset osteoarthritis of mouse temporomandibular joint induced by partial disectomy. *Osteoarthritis and cartilage / OARS, Osteoarthritis Research Society*. 2006;17(7): 917-22.
22. Abou-Jaoude A, Badique L, Mlih M, Awan S, Guo S, Lemle A, et al. Loss of the adaptor protein ShcA in endothelial cells protects against monocyte macrophage adhesion, LDL-oxidation, and atherosclerotic lesion formation. *Scientific reports*. 2018;8(1):4501.
23. DeLise AM, Fischer L, and Tuan RS. Cellular interactions and signaling in cartilage development. *Osteoarthritis and cartilage / OARS, Osteoarthritis Research Society*. 2000;8(5):309-34.
24. Linsenmayer TF, Chen QA, Gibney E, Gordon MK, Marchant JK, Mayne R, et al. Collagen types IX and X in the developing chick tibiotarsus: analyses of mRNAs and proteins. *Development*. 1991;111(1):191-6.
25. Colnot C, Lu C, Hu D, and Helms JA. Distinguishing the contributions of the perichondrium, cartilage, and vascular endothelium to skeletal development. *Dev Biol*. 2004;269(1):55-69.
26. Deng Y, Wu A, Li P, Li G, Qin L, Song H, et al. Yap1 Regulates Multiple Steps of Chondrocyte Differentiation during Skeletal Development and Bone Repair. *Cell reports*. 2016;14(9):2224-37.
27. Zaidi SK, Sullivan AJ, Medina R, Ito Y, van Wijnen AJ, Stein JL, et al. Tyrosine phosphorylation controls Runx2-mediated subnuclear targeting of YAP to repress transcription. *The EMBO journal*. 2004;23(4):790-9.
28. Dreier R. Hypertrophic differentiation of chondrocytes in osteoarthritis: the developmental aspect of degenerative joint disorders. *Arthritis research & therapy*. 2010;12(5):216.
29. van der Kraan PM, Stoop R, Meijers TH, Poole AR, and van den Berg WB. Expression of type X collagen in young and old C57Bl/6 and Balb/c mice. Relation with articular cartilage degeneration. *Osteoarthritis and cartilage / OARS, Osteoarthritis Research Society*. 2001;9(2):92-100.
30. Stoop R, van der Kraan PM, Buma P, Hollander AP, Billingham RC, Poole AR, et al. Type II collagen degradation in spontaneous osteoarthritis in C57Bl/6 and BALB/c mice. *Arthritis and rheumatism*. 1999;42(11):2381-9.
31. Staines KA, Pollard AS, McGonnell IM, Farquharson C, and Pitsillides AA. Cartilage to bone transitions in health and disease. *The Journal of endocrinology*. 2013;219(1):R1-R12.
32. Karsenty G, and Wagner EF. Reaching a genetic and molecular understanding of skeletal development. *Developmental cell*. 2002;2(4):389-406.
33. Provot S, Nachtrab G, Paruch J, Chen AP, Silva A, and Kronenberg HM. A-raf and B-raf are dispensable for normal endochondral bone development, and parathyroid hormone-related peptide suppresses extracellular signal-regulated kinase activation in hypertrophic chondrocytes. *Molecular and cellular biology*. 2008;28(1):344-57.
34. Ge C, Xiao G, Jiang D, and Franceschi RT. Critical role of the extracellular signal-regulated kinase-MAPK pathway in osteoblast differentiation and skeletal development. *The Journal of cell biology*. 2007;176(5):709-18.



35. Won GW, Sung M, Lee Y, and Lee YH. MST2 kinase regulates osteoblast differentiation by phosphorylating and inhibiting Runx2 in C2C12 cells. *Biochemical and biophysical research communications*. 2019.
36. Galan JA, and Avruch J. MST1/MST2 Protein Kinases: Regulation and Physiologic Roles. *Biochemistry*. 2016;55(39):5507-19.
37. Espanel X, and Sudol M. Yes-associated protein and p53-binding protein-2 interact through their WW and SH3 domains. *The Journal of biological chemistry*. 2001;276(17):14514-23.
38. Lowenstein EJ, Daly RJ, Batzer AG, Li W, Margolis B, Lammers R, et al. The SH2 and SH3 domain-containing protein GRB2 links receptor tyrosine kinases to ras signaling. *Cell*. 1992;70(3):431-42.
39. Rozakis-Adcock M, McGlade J, Mbamalu G, Pelicci G, Daly R, Li W, et al. Association of the Shc and Grb2/Sem5 SH2-containing proteins is implicated in activation of the Ras pathway by tyrosine kinases. *Nature*. 1992;360(6405):689-92.
40. Ripmeester EGJ, Timur UT, Caron MMJ, and Welting TJM. Recent Insights into the Contribution of the Changing Hypertrophic Chondrocyte Phenotype in the Development and Progression of Osteoarthritis. *Frontiers in bioengineering and biotechnology*. 2018;6:18.
41. Woods A, Wang G, and Beier F. Regulation of chondrocyte differentiation by the actin cytoskeleton and adhesive interactions. *Journal of cellular physiology*. 2007;213(1):1-8.
42. Yang K, Kim JH, Kim HJ, Park IS, Kim IY, and Yang BS. Tyrosine 740 phosphorylation of discoidin domain receptor 2 by Src stimulates intramolecular autophosphorylation and Shc signaling complex formation. *The Journal of biological chemistry*. 2005;280(47):39058-66.
